# Supplementary material for: Metal-centered monocyclic carbon wheel clusters with record coordination numbers in planar species
Source: Royal Society of Chemistry journal article supplement (doi:10.1039/d1ra05367a), 2021-01-01
Supplement: d1ra05367a1.pdf [file d1ra05367a1.pdf]

## Supporting information

# Metal-Centered Monocyclic Carbon Wheel Clusters with Record Coordination Numbers in Planar Species

Xiao-Qin Lu, Hai-Gang Lu,\* and Si-Dian Li\*

*Nanocluster Laboratory, Institute of Molecular Science Shanxi University, Taiyuan, Shanxi 030006, China.*

*\*E-mails: luhg@sxu.edu.cn, lisidian@sxu.edu.cn*

## Table of Contents

**Figure S1.** Relative energies of low-lying isomers of  $\text{LaC}_{13}^+$ .

**Figure S2.** Relative energies of low-lying isomers of  $\text{CaC}_{13}$ .

**Figure S3.** Relative energies of low-lying isomers of  $\text{AcC}_{13}^+$ .

**Figure S4.** Relative energies of low-lying isomers of  $\text{LaC}_{14}^+$ .

**Figure S5.** Relative energies of low-lying isomers of  $\text{YB}_6\text{C}_6^+$ .

**Figure S6.** Relative energies of low-lying isomers of  $\text{ScB}_5\text{C}_6$ .

**Figure S7.** Born-Oppenheimer molecular dynamics simulations of  $\text{La}\text{C}\text{C}_{13}^+$  (**1**).

**Figure S8.** Optimized structures of  $\text{Sc}\text{C}\text{C}_{13}^+$ ,  $\text{Y}\text{C}\text{C}_{13}^+$ ,  $\text{Ce}\text{C}\text{C}_{13}^+$ ,  $\text{Ce}\text{C}\text{C}_{13}^{2+}$ ,  $\text{La}\text{C}\text{BC}_{12}^+$ ,  $\text{La}\text{C}\text{BNC}_{11}^+$ , and  $\text{La}\text{C}\text{B}_4\text{N}_4\text{C}_5^+$ , at M06-2X level.

**Figure S9.** Eigenvalue spectrum of  $D_{13h}$   $\text{La}\text{C}\text{C}_{13}^+$  (**1**).

**Figure S10.** The high-resolution  $\pi$ - and  $\sigma$ -ring current maps of  $\text{La}\text{C}\text{C}_{13}^+$  (**1**),  $\text{Y}\text{C}\text{B}_6\text{C}_6^+$  (**5**), and  $\text{Sc}\text{C}\text{B}_5\text{C}_6$  (**6**), in comparison with the  $\pi$ -ring current map of  $D_{6h}$   $\text{C}_6\text{H}_6$ .

**Figure S11.** Simulated IR, Raman, and UV-Vis spectra of  $\text{La}\text{C}\text{C}_{13}^+$  (**1**) (a) and  $\text{Y}\text{C}\text{B}_6\text{C}_6^+$  (**5**) (b).

**Table S1.** Optimized coordinates (x, y, z) of  $D_{13h}$   $\text{La}\text{C}\text{C}_{13}^+$  (**1**),  $D_{13h}$   $\text{Ca}\text{C}\text{C}_{13}$  (**2**),  $C_{13v}$   $\text{Ac}\text{C}\text{C}_{13}^+$  (**3**),  $C_{2v}$   $\text{La}\text{C}\text{C}_{14}^+$  (**4**),  $C_{2v}$   $\text{Y}\text{C}\text{B}_6\text{C}_6^+$  (**5**),  $C_{2v}$   $\text{Sc}\text{C}\text{B}_5\text{C}_6$  (**6**) [ $\text{La}\text{C}\text{C}_{13}$ ]X (**7**) (X=F, Cl, Br),

$[\text{La}@\text{C}_{13}]^+\text{L}_2$  (**8**) (L=Ar, Kr),  $[\text{La}@\text{C}_{13}]_2\text{O}$  (**9**), and  $C_{3v} \text{N}[\text{La}@\text{C}_{13}]_3$  (**10**) at M06-2X level.

**Figure S1** Relative energies (in eV) of the low-lying isomers of  $\text{La@C}_{13}^+$  calculated at M06-2X, PBE0 (parentheses), and CCSD(T) (square brackets) levels.

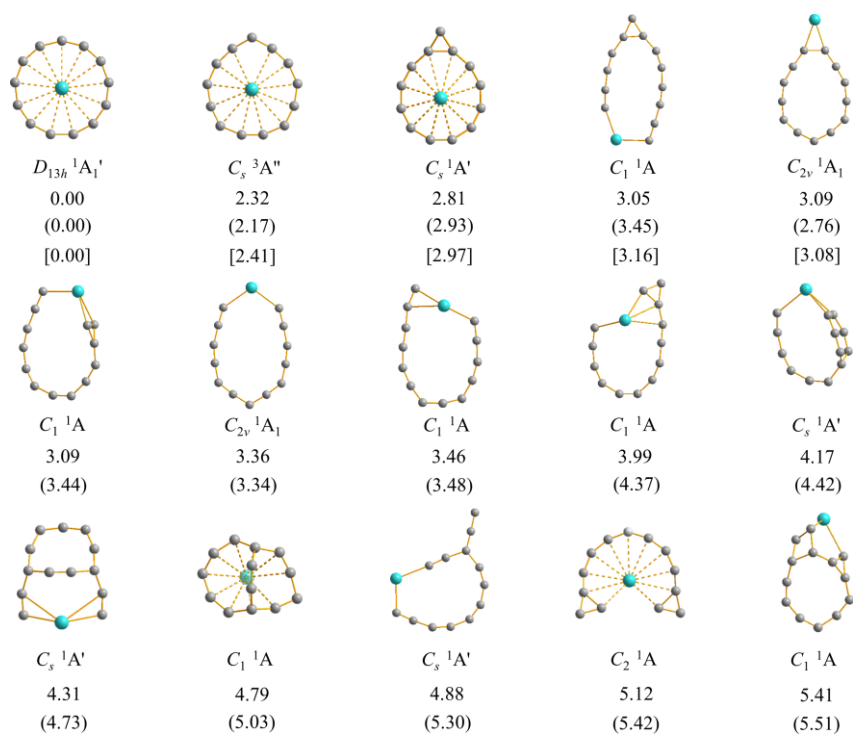

**Figure S2** Relative energies (in eV) of the low-lying isomers of Ca@C<sub>13</sub> calculated at M06-2X, PBE0 (parentheses), and CCSD(T) (square brackets).

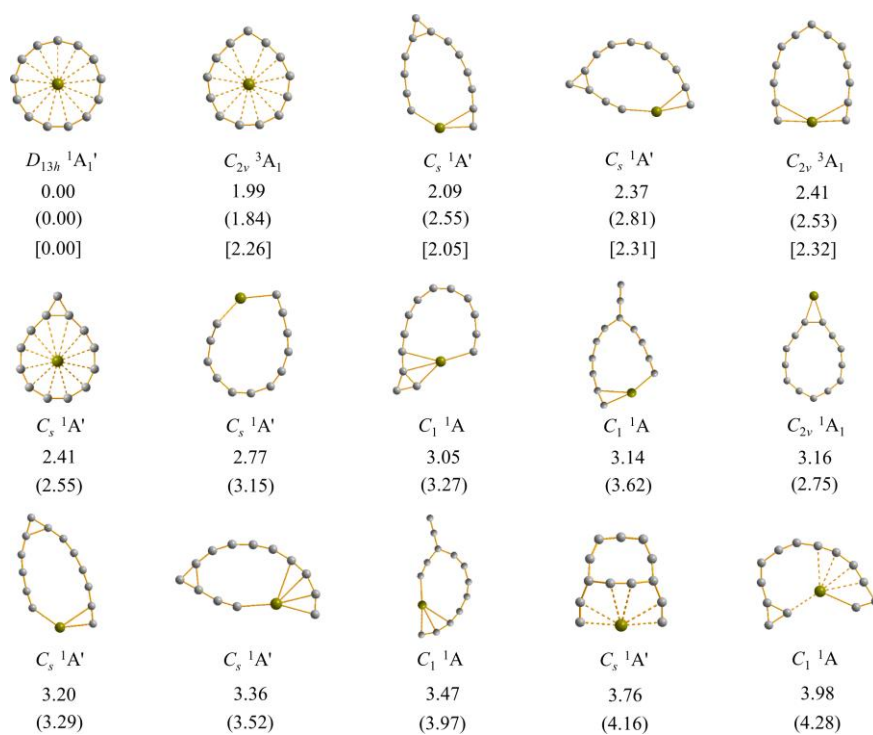

**Figure S3** Relative energies (in eV) of the low-lying isomers of  $\text{Ac}@C_{13}^+$  calculated at M06-2X, PBE0 (parentheses), and CCSD(T) (square brackets).

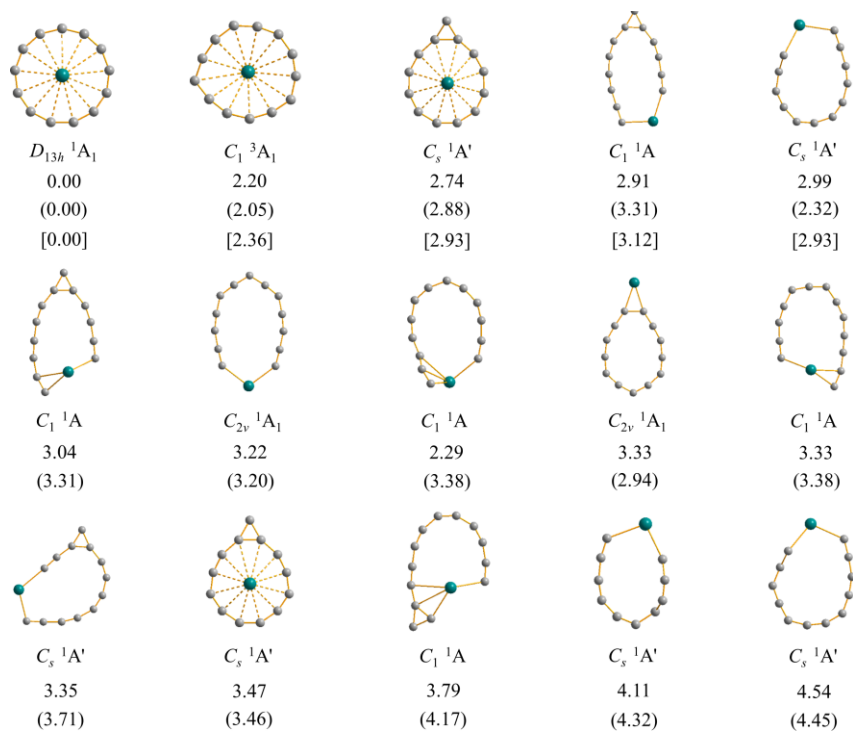

**Figure S4** Relative energies (in eV) of the low-lying isomers of  $\text{La@C}_{14}^+$  calculated at M06-2X, PBE0 (parentheses), and CCSD(T) (square brackets).

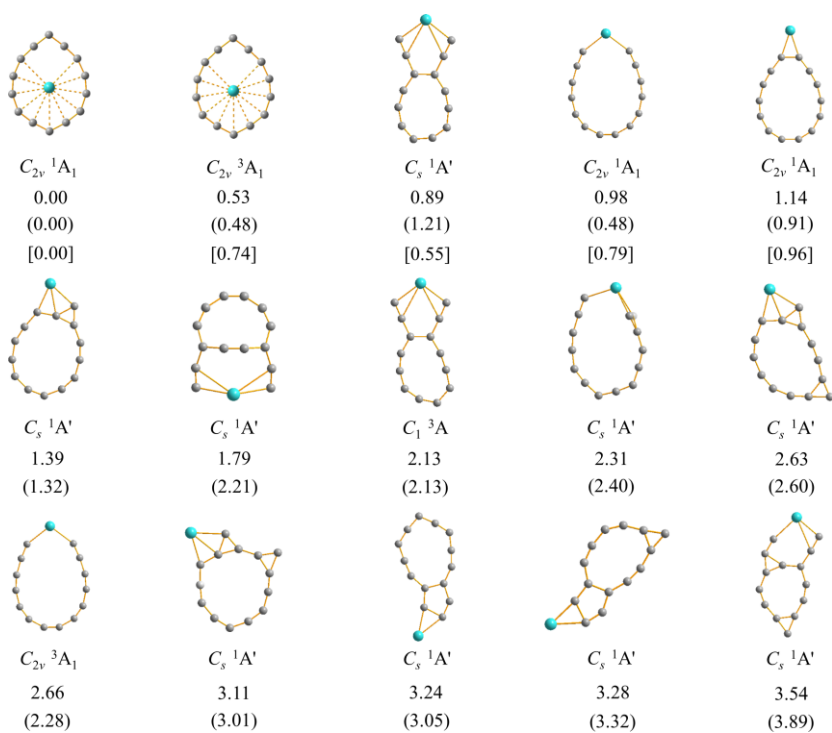

**Figure S5** Relative energies (in eV) of the low-lying isomers of  $Y\text{C}_6\text{C}_6^+$  calculated at M06-2X, PBE0 (parentheses), and CCSD(T) (square brackets).

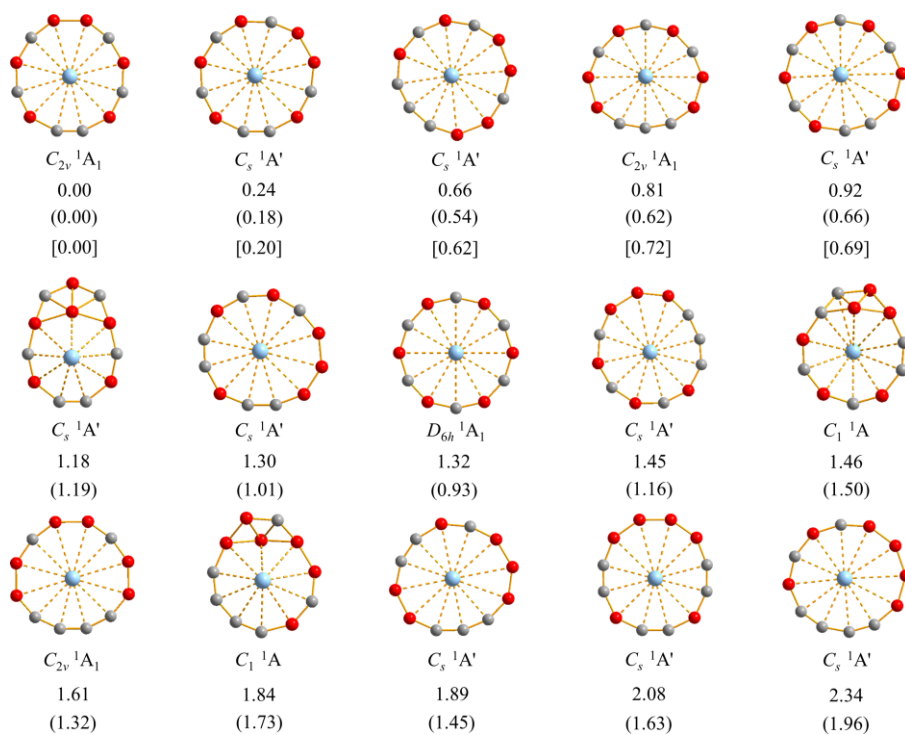

**Figure S6** Relative energies (in eV) of the low-lying isomers of Sc@B<sub>5</sub>C<sub>6</sub> calculated at M06-2X, PBE0 (parentheses), and CCSD(T) (square brackets).

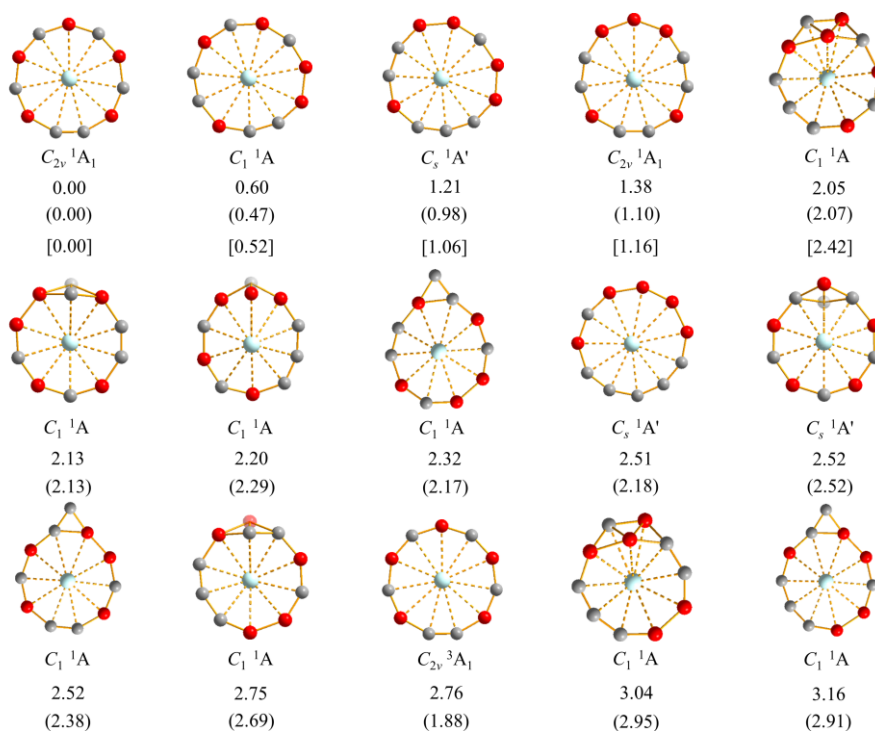



**Figure S7** Born-Oppenheimer molecular dynamics simulations of  $\text{La@C}_{13}^+$  at 300, 800, and 1000 K. The root-mean-square deviation (RMSD) and maximum bond length deviation (MAXD) values (on average) are indicated in Å

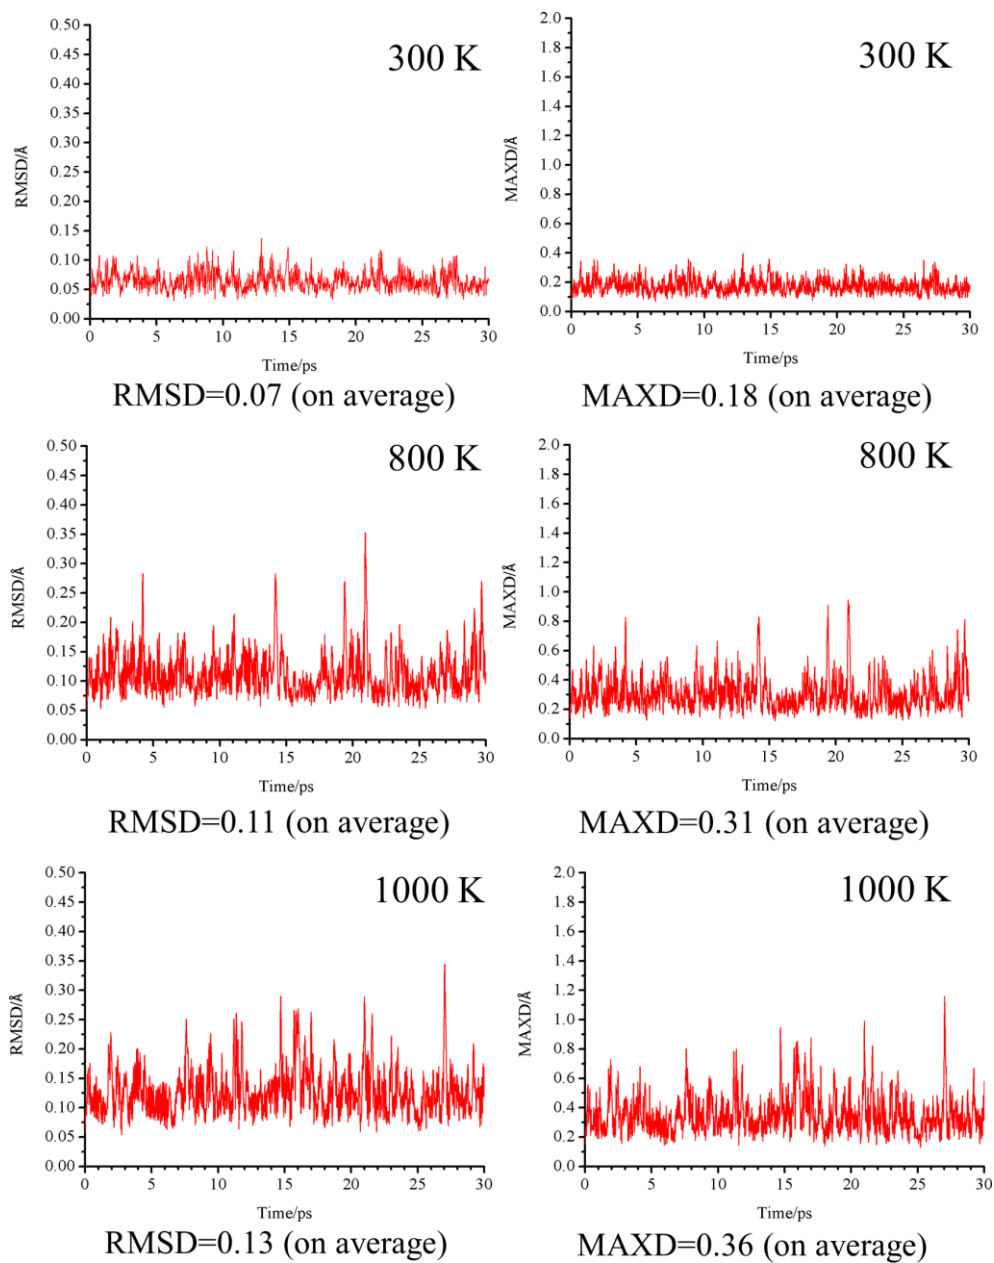

**Figure S8.** Optimized structures of  $\text{Sc}@\text{C}_{13}^+$ ,  $\text{Y}@\text{C}_{13}^+$ ,  $\text{Ac}@\text{C}_{14}^+$ ,  $\text{Ce}@\text{C}_{13}^+$ ,  $\text{Ce}@\text{C}_{13}^{2+}$ ,  $\text{La}@\text{BC}_{12}^+$ ,  $\text{La}@\text{BNC}_{11}^+$ , and  $\text{La}@\text{B}_4\text{N}_4\text{C}_5^+$  at M06-2X level.

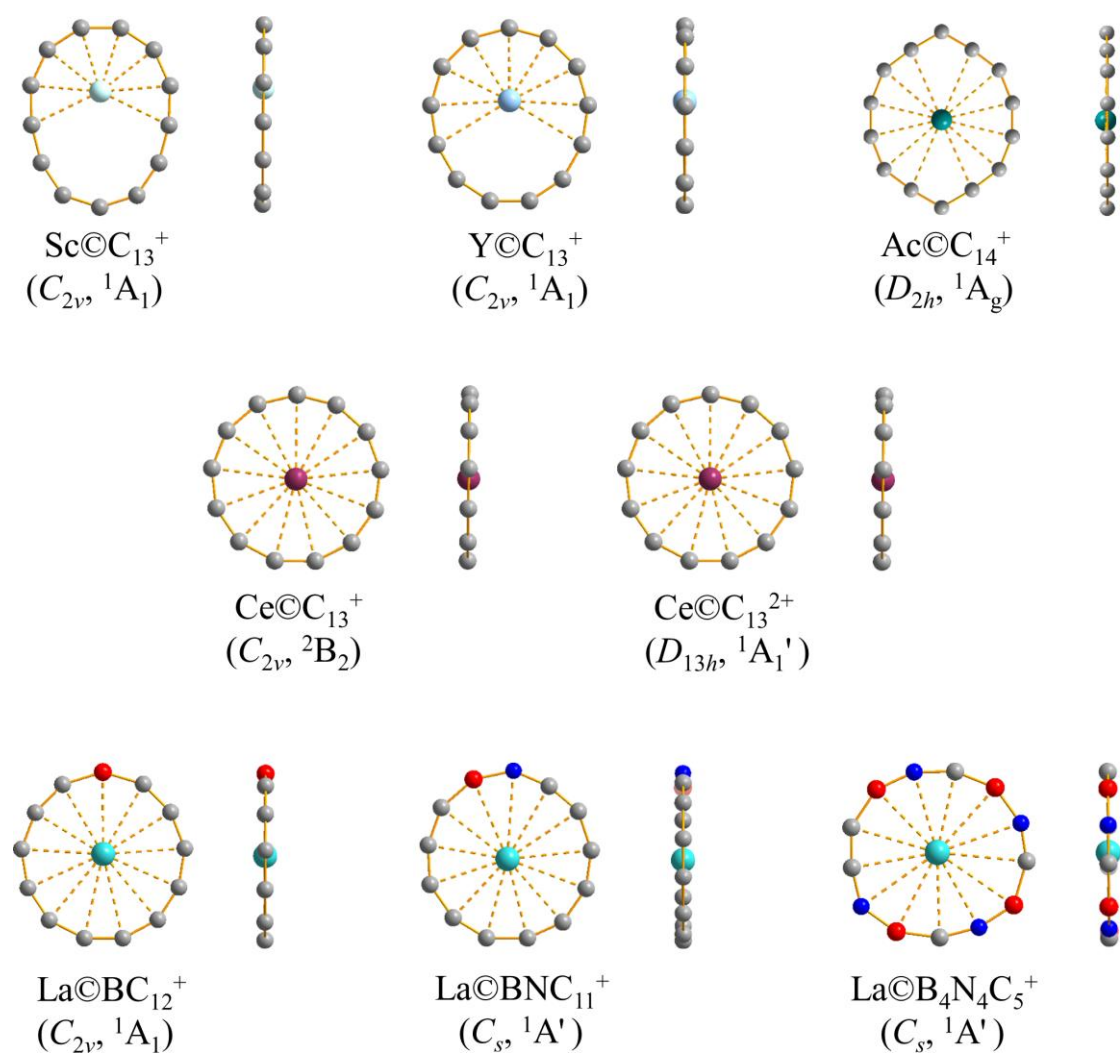

**Figure S9.** Eigenvalue spectrum of  $D_{13h}$   $\text{La@C}_{13}^+$  (**1**) at M062x level, with its 7  $\pi$ -CMOs, 7  $\sigma$ -CMOs, and the 13  $\sigma$ -CMOs corresponding to 13 two-center-two-electron (2c-2e) C-C  $\sigma$  bonds depicted. The calculated HOMO-LUMO energy gap is indicated in eV.

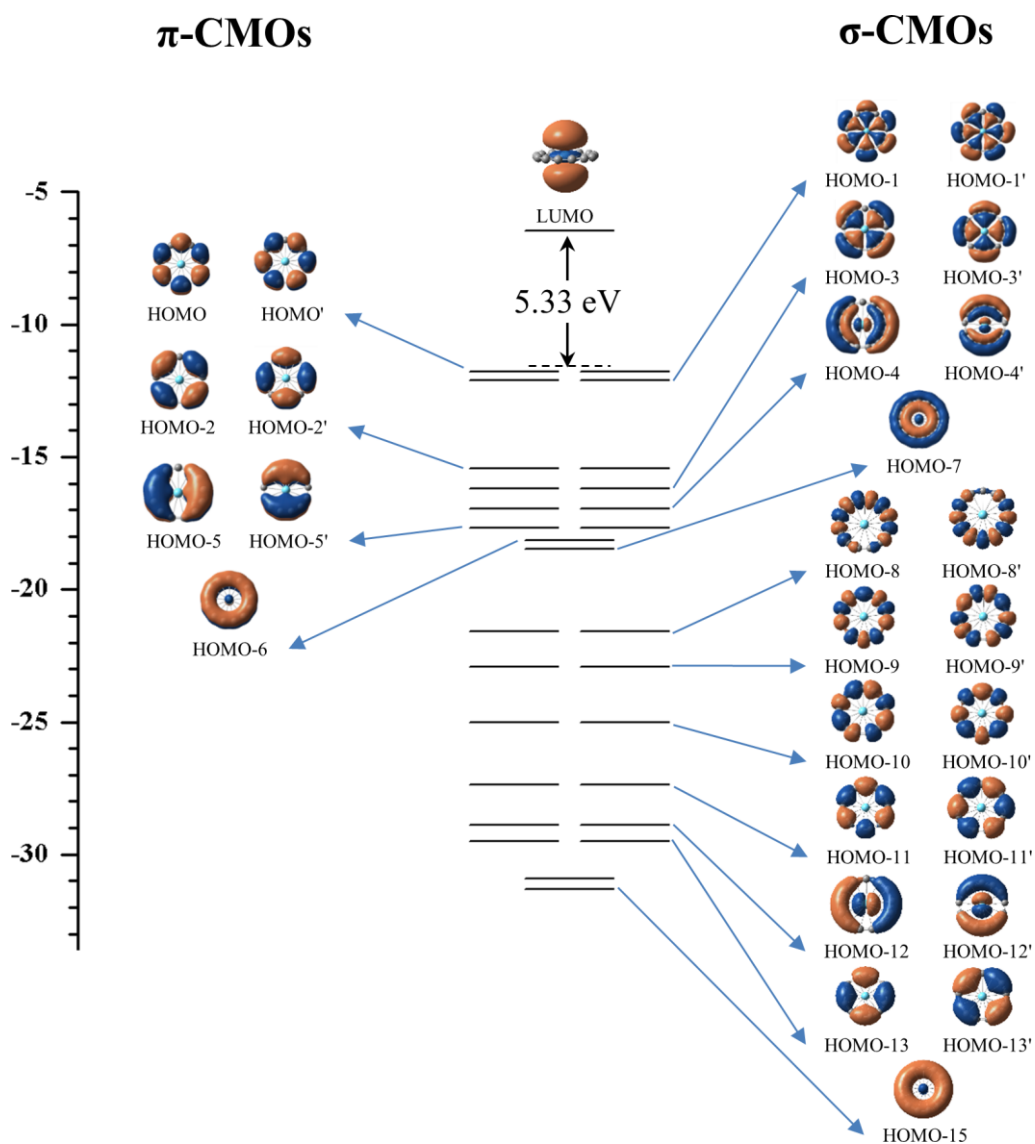

**Figure S10.** The high-resolution  $\pi$ - and  $\sigma$ -ring current maps of  $\text{La}\text{@C}_{13}^+$  (**1**),  $\text{Y}\text{@B}_6\text{C}_6^+$  (**5**), and  $\text{Sc}\text{@B}_5\text{C}_6$  (**6**), respectively, in comparison with the  $\pi$ -ring current map of  $D_{6h}$   $\text{C}_6\text{H}_6$ . The external magnetic field is perpendicular to the wheel plane. The red arrows represent directions and magnitudes of the ring currents at various positions on the ACID iso-surfaces.

$\pi$ -ring current maps of  $\text{La}\text{@C}_{13}^+$  (**1**)

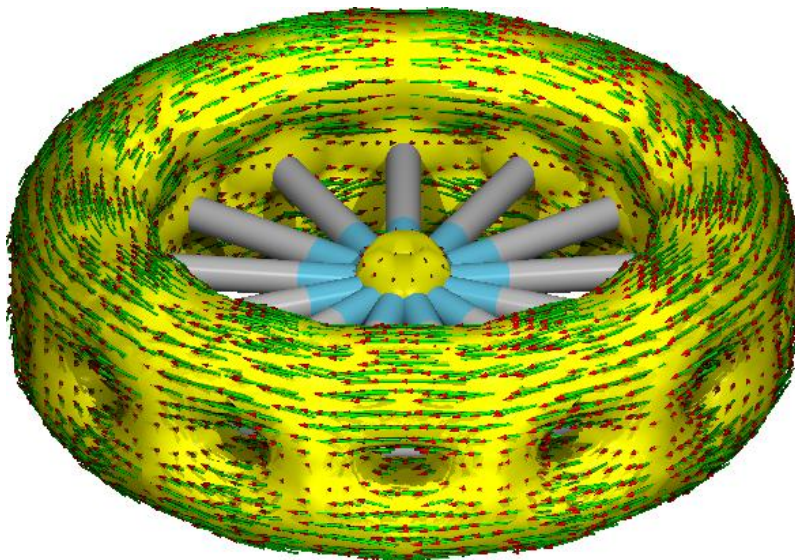

$\sigma$ -ring current maps of  $\text{La}\text{@C}_{13}^+$  (**1**)

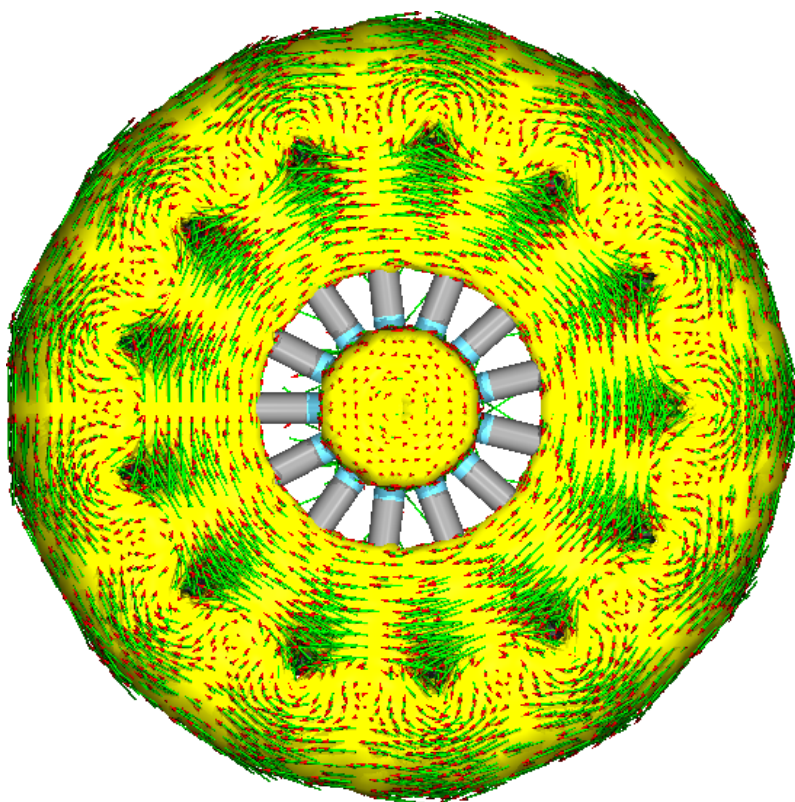

$\pi$ -ring current maps of  $Y@B_6C_6^+$  (5)

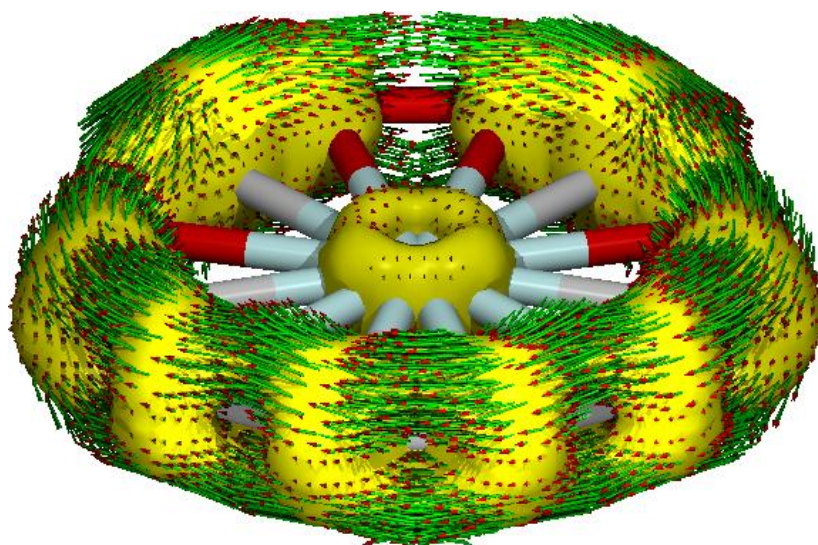

$\sigma$ -ring current maps of  $Y@B_6C_6^+$  (5)

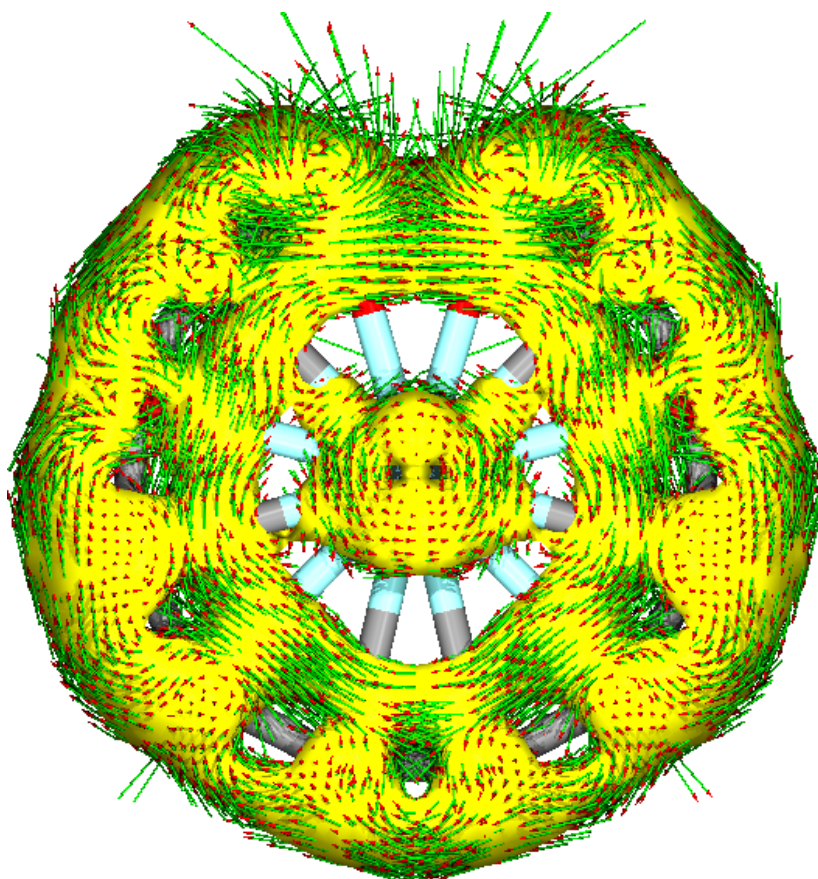

$\pi$ -ring current maps of Sc@B<sub>5</sub>C<sub>6</sub> (6)

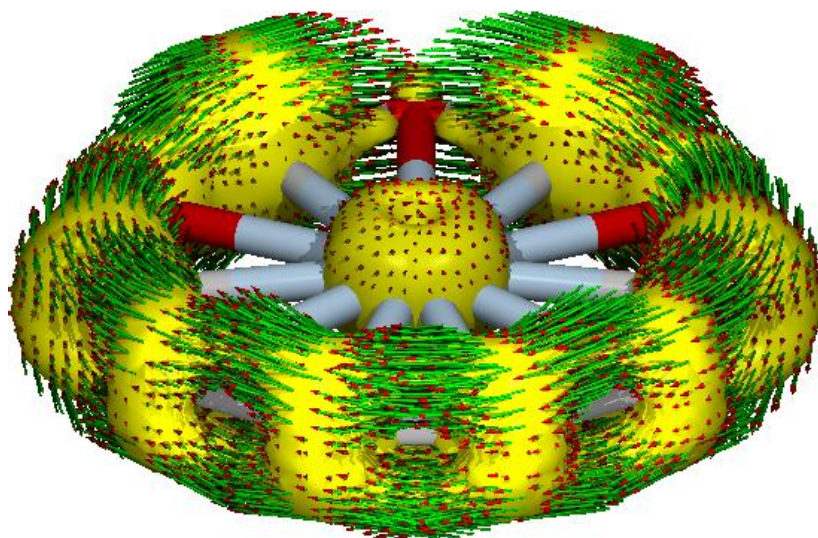

$\sigma$ -ring current maps of Sc@B<sub>5</sub>C<sub>6</sub> (6)

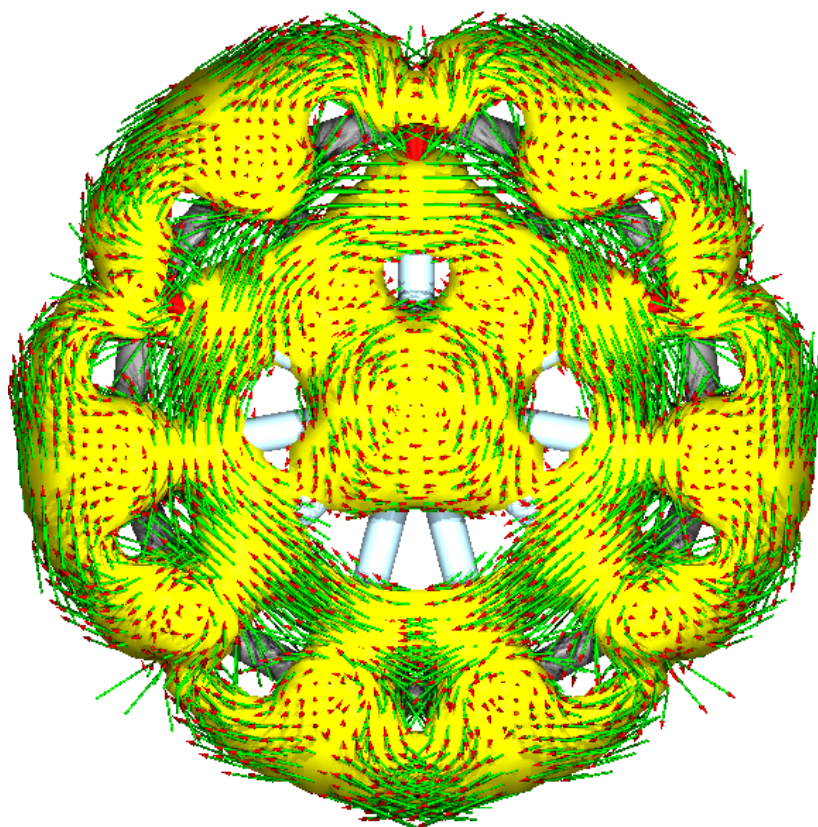

$\pi$ -ring current maps of  $D_{6h}$   $C_6H_6$

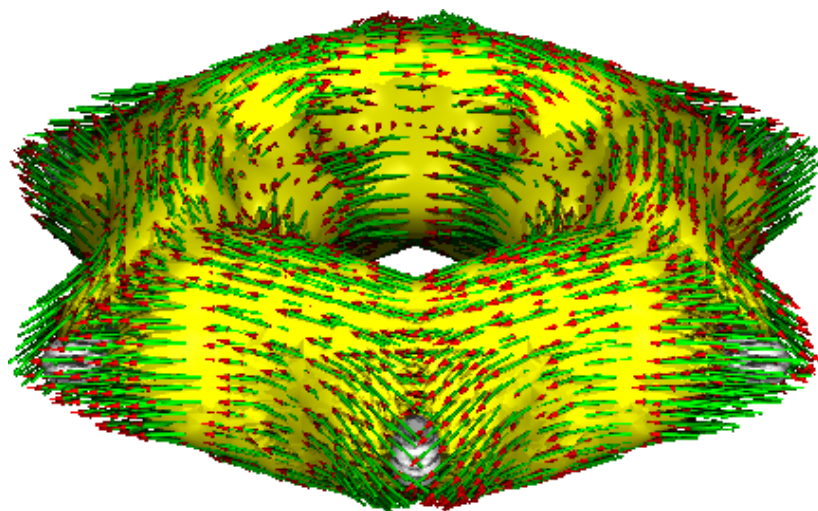

**Figure S11.** Simulated IR, Raman, and UV-Vis spectra of  $\text{La}\text{C}_{13}^+$  (**1**) (a) and  $\text{Y}\text{C}_6\text{B}_6^+$  (**5**) (b) at M06-2X level.

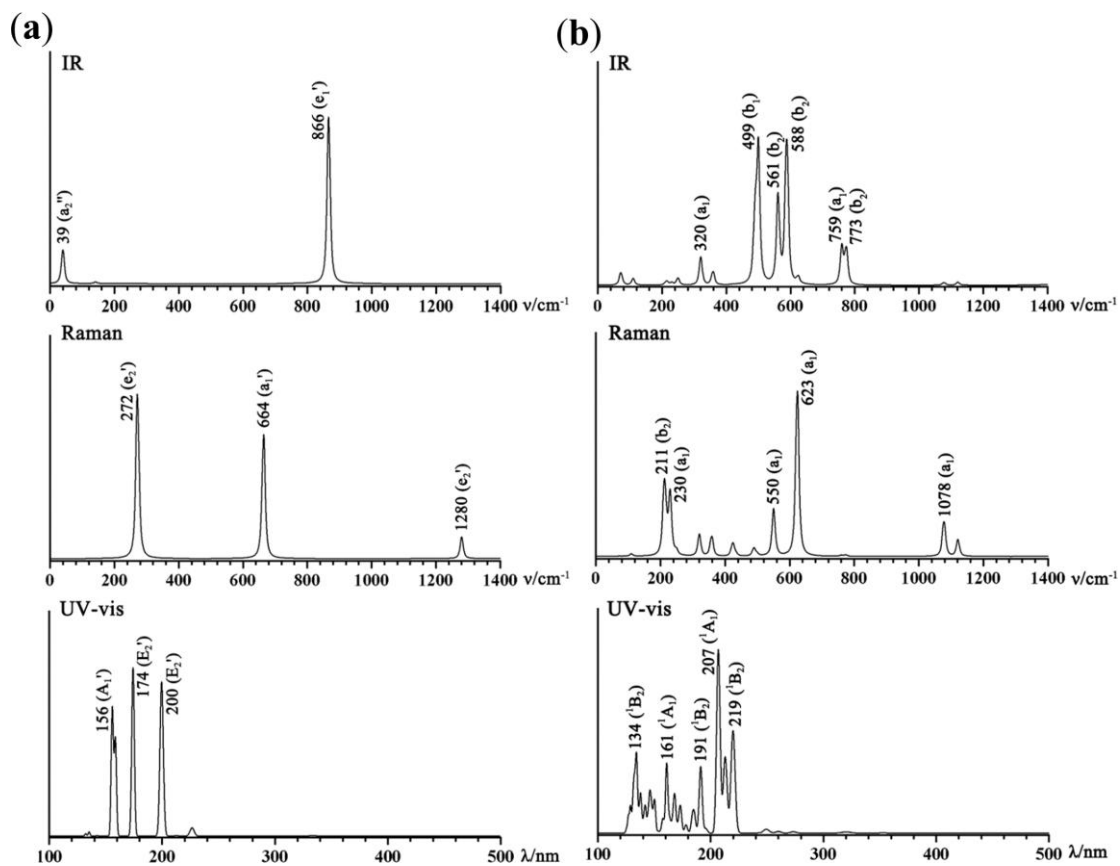



**Table S1** Optimized coordinates (x, y, z) of  $D_{13h}$  La@C<sub>13</sub><sup>+</sup> (**1**),  $D_{13h}$  Ca@C<sub>13</sub> (**2**),  $C_{13v}$  Ac@C<sub>13</sub><sup>+</sup> (**3**),  $C_{2v}$  La@C<sub>14</sub><sup>+</sup> (**4**),  $C_{2v}$  Y@B<sub>6</sub>C<sub>6</sub><sup>+</sup> (**5**), and  $C_{2v}$  Sc@B<sub>5</sub>C<sub>6</sub> (**6**) at M06-2X level.

$D_{13h}$  La@C<sub>13</sub><sup>+</sup> (**1**)

|    |             |             |            |
|----|-------------|-------------|------------|
| La | 0.00000000  | 0.00000000  | 0.00000000 |
| C  | 0.00000000  | 2.70031100  | 0.00000000 |
| C  | 1.25489700  | 2.39100600  | 0.00000000 |
| C  | 2.22231200  | 1.53395100  | 0.00000000 |
| C  | 2.68062200  | 0.32548600  | 0.00000000 |
| C  | 2.52483400  | -0.95754300 | 0.00000000 |
| C  | 1.79063700  | -2.02121200 | 0.00000000 |
| C  | 0.64622700  | -2.62184500 | 0.00000000 |
| C  | -0.64622700 | -2.62184500 | 0.00000000 |
| C  | -1.79063700 | -2.02121200 | 0.00000000 |
| C  | -2.52483400 | -0.95754300 | 0.00000000 |
| C  | -2.68062200 | 0.32548600  | 0.00000000 |
| C  | -2.22231200 | 1.53395100  | 0.00000000 |
| C  | -1.25489700 | 2.39100600  | 0.00000000 |

$D_{13h}$  Ca@C<sub>13</sub> (**2**)

|    |             |             |            |
|----|-------------|-------------|------------|
| Ca | 0.00000000  | 0.00000000  | 0.00000000 |
| C  | 0.00000000  | 2.69495700  | 0.00000000 |
| C  | -1.25240900 | 2.38626600  | 0.00000000 |
| C  | -2.21790600 | 1.53091000  | 0.00000000 |
| C  | -2.67530800 | 0.32484100  | 0.00000000 |
| C  | -2.51982900 | -0.95564500 | 0.00000000 |
| C  | -1.78708700 | -2.01720400 | 0.00000000 |
| C  | -0.64494500 | -2.61664600 | 0.00000000 |
| C  | 0.64494500  | -2.61664600 | 0.00000000 |
| C  | 1.78708700  | -2.01720400 | 0.00000000 |
| C  | 2.51982900  | -0.95564500 | 0.00000000 |
| C  | 2.67530800  | 0.32484100  | 0.00000000 |
| C  | 2.21790600  | 1.53091000  | 0.00000000 |
| C  | 1.25240900  | 2.38626600  | 0.00000000 |

$C_{13v} \text{Ac} \odot C_{13}^+ \text{ (3)}$ 

|    |             |             |             |
|----|-------------|-------------|-------------|
| Ac | 0.00000000  | 0.00000000  | 0.27445900  |
| C  | 0.00000000  | 2.70503500  | -0.31316500 |
| C  | -1.25709200 | 2.39519000  | -0.31316500 |
| C  | -2.22620000 | 1.53663500  | -0.31316500 |
| C  | -2.68531200 | 0.32605600  | -0.31316500 |
| C  | -2.52925200 | -0.95921900 | -0.31316500 |
| C  | -1.79377000 | -2.02474800 | -0.31316500 |
| C  | -0.64735700 | -2.62643200 | -0.31316500 |
| C  | 0.64735700  | -2.62643200 | -0.31316500 |
| C  | 1.79377000  | -2.02474800 | -0.31316500 |
| C  | 2.52925200  | -0.95921900 | -0.31316500 |
| C  | 2.68531200  | 0.32605600  | -0.31316500 |
| C  | 2.22620000  | 1.53663500  | -0.31316500 |
| C  | 1.25709200  | 2.39519000  | -0.31316500 |

 $C_{2v} \text{La} \odot C_{14}^+ \text{ (4)}$ 

|    |            |             |             |
|----|------------|-------------|-------------|
| C  | 0.00000000 | 1.06442400  | -2.77909800 |
| C  | 0.00000000 | 0.00000000  | -3.58381600 |
| C  | 0.00000000 | -1.06442400 | -2.77909800 |
| C  | 0.00000000 | -1.97746600 | -1.90237600 |
| C  | 0.00000000 | -2.51687100 | -0.69833800 |
| C  | 0.00000000 | -2.60159900 | 0.56258400  |
| C  | 0.00000000 | 1.97746600  | -1.90237600 |
| C  | 0.00000000 | 2.51687100  | -0.69833800 |
| C  | 0.00000000 | 2.60159900  | 0.56258400  |
| C  | 0.00000000 | 2.17259200  | 1.81234100  |
| C  | 0.00000000 | 1.16174800  | 2.58919500  |
| C  | 0.00000000 | 0.00000000  | 3.20312200  |
| C  | 0.00000000 | -1.16174800 | 2.58919500  |
| C  | 0.00000000 | -2.17259200 | 1.81234100  |
| La | 0.00000000 | 0.00000000  | 0.12758700  |

$C_{2v} Y@B_6C_6^+ (5)$ 

|   |            |             |             |
|---|------------|-------------|-------------|
| C | 0.00000000 | 0.61934300  | -2.58453600 |
| C | 0.00000000 | 2.52889600  | -0.70979100 |
| C | 0.00000000 | 1.86516600  | 1.90464200  |
| C | 0.00000000 | -1.86516600 | 1.90464200  |
| C | 0.00000000 | -2.52889600 | -0.70979100 |
| C | 0.00000000 | -0.61934300 | -2.58453600 |
| Y | 0.00000000 | 0.00000000  | 0.03761300  |
| B | 0.00000000 | 1.91654000  | -1.91861200 |
| B | 0.00000000 | -1.91654000 | -1.91861200 |
| B | 0.00000000 | -2.58199300 | 0.69850300  |
| B | 0.00000000 | -0.78940700 | 2.74104200  |
| B | 0.00000000 | 2.58199300  | 0.69850300  |
| B | 0.00000000 | 0.78940700  | 2.74104200  |

 $C_{2v} Sc@B_5C_6 (6)$ 

|    |            |             |             |
|----|------------|-------------|-------------|
| C  | 0.00000000 | 1.33240400  | 2.06357200  |
| C  | 0.00000000 | 2.41814500  | -0.37764100 |
| C  | 0.00000000 | 0.62482100  | -2.33794800 |
| C  | 0.00000000 | -0.62482100 | -2.33794800 |
| C  | 0.00000000 | -2.41814500 | -0.37764100 |
| C  | 0.00000000 | -1.33240400 | 2.06357200  |
| B  | 0.00000000 | 0.00000000  | 2.49451500  |
| B  | 0.00000000 | -2.25334300 | 1.03591200  |
| B  | 0.00000000 | -1.88347400 | -1.62452000 |
| B  | 0.00000000 | 2.25334300  | 1.03591200  |
| B  | 0.00000000 | 1.88347400  | -1.62452000 |
| Sc | 0.00000000 | 0.00000000  | 0.05923600  |

$C_{13v}$  [La@C<sub>13</sub>]F (7)

|    |             |             |             |
|----|-------------|-------------|-------------|
| La | 0.00000000  | 0.00000000  | 0.23089700  |
| C  | 0.00000000  | 2.70008300  | -0.43339900 |
| C  | 1.25479100  | 2.39080500  | -0.43339900 |
| C  | 2.22212500  | 1.53382200  | -0.43339900 |
| C  | 2.68039600  | 0.32545900  | -0.43339900 |
| C  | 2.52462200  | -0.95746300 | -0.43339900 |
| C  | 1.79048600  | -2.02104100 | -0.43339900 |
| C  | 0.64617200  | -2.62162400 | -0.43339900 |
| C  | -0.64617200 | -2.62162400 | -0.43339900 |
| C  | -1.79048600 | -2.02104100 | -0.43339900 |
| C  | -2.52462200 | -0.95746300 | -0.43339900 |
| C  | -2.68039600 | 0.32545900  | -0.43339900 |
| C  | -2.22212500 | 1.53382200  | -0.43339900 |
| C  | -1.25479100 | 2.39080500  | -0.43339900 |
| F  | 0.00000000  | 0.00000000  | 2.29377800  |

 $C_{13v}$  [La@C<sub>13</sub>]Cl (7)

|    |             |             |             |
|----|-------------|-------------|-------------|
| La | 0.00000000  | 0.00000000  | 0.00879100  |
| C  | 0.00000000  | 2.70102300  | -0.56629200 |
| C  | 1.25522800  | 2.39163700  | -0.56629200 |
| C  | 2.22289800  | 1.53435600  | -0.56629200 |
| C  | 2.68132900  | 0.32557200  | -0.56629200 |
| C  | 2.52550000  | -0.95779600 | -0.56629200 |
| C  | 1.79111000  | -2.02174500 | -0.56629200 |
| C  | 0.64639700  | -2.62253600 | -0.56629200 |
| C  | -0.64639700 | -2.62253600 | -0.56629200 |
| C  | -1.79111000 | -2.02174500 | -0.56629200 |
| C  | -2.52550000 | -0.95779600 | -0.56629200 |
| C  | -2.68132900 | 0.32557200  | -0.56629200 |
| C  | -2.22289800 | 1.53435600  | -0.56629200 |
| C  | -1.25522800 | 2.39163700  | -0.56629200 |
| Cl | 0.00000000  | 0.00000000  | 2.56880600  |

$C_{13v} [\text{La}@\text{C}_{13}]\text{Br}$  (7)

|    |             |             |             |
|----|-------------|-------------|-------------|
| La | 0.00000000  | 0.00000000  | 0.29829600  |
| C  | 0.00000000  | 2.70085900  | 0.87268500  |
| C  | -1.25515200 | 2.39149200  | 0.87268500  |
| C  | -2.22276400 | 1.53426300  | 0.87268500  |
| C  | -2.68116700 | 0.32555300  | 0.87268500  |
| C  | -2.52534700 | -0.95773800 | 0.87268500  |
| C  | -1.79100100 | -2.02162200 | 0.87268500  |
| C  | -0.64635800 | -2.62237700 | 0.87268500  |
| C  | 0.64635800  | -2.62237700 | 0.87268500  |
| C  | 1.79100100  | -2.02162200 | 0.87268500  |
| C  | 2.52534700  | -0.95773800 | 0.87268500  |
| C  | 2.68116700  | 0.32555300  | 0.87268500  |
| C  | 2.22276400  | 1.53426300  | 0.87268500  |
| C  | 1.25515200  | 2.39149200  | 0.87268500  |
| Br | 0.00000000  | 0.00000000  | -2.43063700 |

 $D_{13h} [\text{La}@\text{C}_{13}]^+\text{Ar}_2$  (8)

|    |             |             |             |
|----|-------------|-------------|-------------|
| La | 0.00000000  | 0.00000000  | 0.00000000  |
| C  | 0.00000000  | 2.70130000  | 0.00000000  |
| C  | 1.25535700  | 2.39188200  | 0.00000000  |
| C  | 2.22312600  | 1.53451300  | 0.00000000  |
| C  | 2.68160400  | 0.32560600  | 0.00000000  |
| C  | 2.52575900  | -0.95789400 | 0.00000000  |
| C  | 1.79129300  | -2.02195200 | 0.00000000  |
| C  | 0.64646300  | -2.62280500 | 0.00000000  |
| C  | -0.64646300 | -2.62280500 | 0.00000000  |
| C  | -1.79129300 | -2.02195200 | 0.00000000  |
| C  | -2.52575900 | -0.95789400 | 0.00000000  |
| C  | -2.68160400 | 0.32560600  | 0.00000000  |
| C  | -2.22312600 | 1.53451300  | 0.00000000  |
| C  | -1.25535700 | 2.39188200  | 0.00000000  |
| Ar | 0.00000000  | 0.00000000  | 3.03439600  |
| Ar | 0.00000000  | 0.00000000  | -3.03439600 |

$D_{13h} [\text{La}@\text{C}_{13}]^+\text{Kr}_2$  (8)

|    |             |             |             |
|----|-------------|-------------|-------------|
| La | 0.00000000  | 0.00000000  | 0.00000000  |
| C  | 0.00000000  | 2.70191300  | 0.00000000  |
| C  | 1.25564200  | 2.39242500  | 0.00000000  |
| C  | 2.22363100  | 1.53486200  | 0.00000000  |
| C  | 2.68221300  | 0.32568000  | 0.00000000  |
| C  | 2.52633300  | -0.95811200 | 0.00000000  |
| C  | 1.79170000  | -2.02241100 | 0.00000000  |
| C  | 0.64661000  | -2.62340000 | 0.00000000  |
| C  | -0.64661000 | -2.62340000 | 0.00000000  |
| C  | -1.79170000 | -2.02241100 | 0.00000000  |
| C  | -2.52633300 | -0.95811200 | 0.00000000  |
| C  | -2.68221300 | 0.32568000  | 0.00000000  |
| C  | -2.22363100 | 1.53486200  | 0.00000000  |
| C  | -1.25564200 | 2.39242500  | 0.00000000  |
| Kr | 0.00000000  | 0.00000000  | 3.17108300  |
| Kr | 0.00000000  | 0.00000000  | -3.17108300 |

 $C_{2v} [\text{La}@\text{C}_{13}]_2\text{O}$  (9)

|    |             |             |             |
|----|-------------|-------------|-------------|
| O  | 0.00000000  | 0.00000000  | 0.91849300  |
| La | 0.00000000  | 2.04846100  | 0.34376700  |
| C  | -2.24054500 | 2.47090100  | -1.20541700 |
| C  | -1.62645500 | 1.65214700  | -1.93541500 |
| C  | -2.49304700 | 3.21215700  | -0.13506300 |
| C  | -0.72572900 | 0.75304900  | -2.39645200 |
| C  | -2.05578800 | 3.84679100  | 0.87217200  |
| C  | 0.72572900  | 0.75304900  | -2.39645200 |
| C  | -1.28237200 | 4.21321100  | 1.87601400  |
| C  | 1.62645500  | 1.65214700  | -1.93541500 |
| C  | 0.00000000  | 4.36305400  | 1.97020900  |
| C  | 2.24054500  | 2.47090100  | -1.20541700 |
| C  | 1.28237200  | 4.21321100  | 1.87601400  |
| C  | 2.49304700  | 3.21215700  | -0.13506300 |
| C  | 2.05578800  | 3.84679100  | 0.87217200  |
| La | 0.00000000  | -2.04846100 | 0.34376700  |
| C  | -0.72572900 | -0.75304900 | -2.39645200 |
| C  | 0.72572900  | -0.75304900 | -2.39645200 |
| C  | -1.62645500 | -1.65214700 | -1.93541500 |

|   |             |             |             |
|---|-------------|-------------|-------------|
| C | 1.62645500  | -1.65214700 | -1.93541500 |
| C | -2.24054500 | -2.47090100 | -1.20541700 |
| C | 2.24054500  | -2.47090100 | -1.20541700 |
| C | -2.49304700 | -3.21215700 | -0.13506300 |
| C | 2.49304700  | -3.21215700 | -0.13506300 |
| C | -2.05578800 | -3.84679100 | 0.87217200  |
| C | 2.05578800  | -3.84679100 | 0.87217200  |
| C | -1.28237200 | -4.21321100 | 1.87601400  |
| C | 1.28237200  | -4.21321100 | 1.87601400  |
| C | 0.00000000  | -4.36305400 | 1.97020900  |

$C_{3v}$  N[La@C<sub>13</sub>]<sub>3</sub> (10)

|    |             |             |             |
|----|-------------|-------------|-------------|
| N  | 0.00000000  | 0.00000000  | 0.59400600  |
| La | 1.99002800  | 1.14894300  | 0.32842400  |
| C  | 0.75090100  | 3.62570000  | -1.02380100 |
| C  | 0.75550800  | 2.63160600  | -2.07261900 |
| C  | 1.64696500  | 3.88817000  | -0.04035000 |
| C  | 1.61017400  | 1.65302200  | -2.44407000 |
| C  | 2.40969900  | 3.80059000  | 0.95561300  |
| C  | 2.23664600  | 0.56794100  | -2.44407000 |
| C  | 3.12026800  | 3.28104000  | 1.95156200  |
| C  | 2.65679100  | -0.66151400 | -2.07261900 |
| C  | 3.91420100  | 2.25986500  | 1.99630300  |
| C  | 3.51539900  | -1.16255100 | -1.02380100 |
| C  | 4.40159800  | 1.06171100  | 1.95156200  |
| C  | 4.19073700  | -0.51777100 | -0.04035000 |
| C  | 4.49625600  | 0.18656500  | 0.95561300  |
| La | 0.00000000  | -2.29788700 | 0.32842400  |
| C  | 2.76449800  | -2.46314900 | -1.02380100 |
| C  | 1.90128300  | -1.97009200 | -2.07261900 |
| C  | 2.54377200  | -3.37039900 | -0.04035000 |
| C  | 0.62647200  | -2.22096200 | -2.44407000 |
| C  | 2.08655800  | -3.98715500 | 0.95561300  |
| C  | -0.62647200 | -2.22096200 | -2.44407000 |
| C  | 1.28133000  | -4.34275100 | 1.95156200  |
| C  | -1.90128300 | -1.97009200 | -2.07261900 |
| C  | 0.00000000  | -4.51973000 | 1.99630300  |
| C  | -2.76449800 | -2.46314900 | -1.02380100 |
| C  | -1.28133000 | -4.34275100 | 1.95156200  |

|    |             |             |             |
|----|-------------|-------------|-------------|
| C  | -2.54377200 | -3.37039900 | -0.04035000 |
| C  | -2.08655800 | -3.98715500 | 0.95561300  |
| La | -1.99002800 | 1.14894300  | 0.32842400  |
| C  | -3.51539900 | -1.16255100 | -1.02380100 |
| C  | -2.65679100 | -0.66151400 | -2.07261900 |
| C  | -4.19073700 | -0.51777100 | -0.04035000 |
| C  | -2.23664600 | 0.56794100  | -2.44407000 |
| C  | -4.49625600 | 0.18656500  | 0.95561300  |
| C  | -1.61017400 | 1.65302200  | -2.44407000 |
| C  | -4.40159800 | 1.06171100  | 1.95156200  |
| C  | -0.75550800 | 2.63160600  | -2.07261900 |
| C  | -3.91420100 | 2.25986500  | 1.99630300  |
| C  | -0.75090100 | 3.62570000  | -1.02380100 |
| C  | -3.12026800 | 3.28104000  | 1.95156200  |
| C  | -1.64696500 | 3.88817000  | -0.04035000 |
| C  | -2.40969900 | 3.80059000  | 0.95561300  |
